# Supplementary material
Source: publisher figshare collection journal article supplement (https://karger.figshare.com/ndownloader/files/30638382)
Supplement: Supplementary file 1 [file 30638382]

# Online Supplementary Material 2 – Division of neuropsychological tests in cognitive constructs

| Cognitive construct | Neuropsychological test(s) |
| --- | --- |
| Attention | Digit Span (WAIS) |
| Executive function | Concept Shifting Test |
| Key-search test (BADS) |
| TMT B |
| Fine motor coordination | Grooved Pegboard |
| Information processing speed | Digit Symbol (WAIS) |
| LDST |
| SCWT |
| TMT A |
| Learning and memory | EBPM |
| HVLT(-R) |
| ISLT |
| List learning task (RBANS) |
| OCLT |
| RAVLT |
| TBPM |
| Verbal fluency | COWA |
| Phonemic and semantic fluency |
| Semantic fluency |
| Visual memory and visuoconstruction | ROCFT |

Abbreviations: COWA, Controlled Oral Word Association Test; EBPM, event-based prospective memory; HVLT(-R), Hopkins Verbal Learning Test(- Revised); ISLT, International Shopping List Test; LDST, Letter Digit Substitution Test; MMSE, Mini-Mental Status Examination; OCLT, One Card Learning Test; RAVLT, Rey Auditory Verbal Learning Test; RBANS, Repeatable Battery for the Assessment of Neuropsychological Status; ROCFT, Rey Osterrieth Complex Figure Test; SCWT, Stroop Color-Word Test; TBPM, time-based prospective memory, TMT, Trail Making Test; WAIS, Wechsler Adult Intelligence Scale;
